# Supplementary material for: A Spatial Probit Econometric Model of Land Change: The Case of Infrastructure Development in Western Amazonia, Peru
Source: PubMed Central journal article supplement (PMC4806871; doi:10.1371/journal.pone.0152058), 2016-03-24
Supplement: pone.0152058.s001.pdf [file pone.0152058.s001.pdf]

## Supplementary Information S1 - Distributions and parameters used in the Bayesian spatial probit model estimation

Eugenio Y. Arima<sup>1,\*</sup>

**1 Department of Geography and the Environment, University of Texas, Austin, Texas, USA**

□305 E 23rd St Austin, TX 78712

\* arima@austin.utexas.edu

### SLS Spatial Probit Model

The model description presented here is heavily based on Smith and LeSage [1]. Following the notation described in the main manuscript, the spatial probit model can be written in full matrix notation as:

$$\begin{aligned} y^* &= X\beta + \Delta\theta + \epsilon \\ \theta &= \rho W\theta + \mu \\ \Delta &= \begin{pmatrix} \mathbf{1}_1 & & \\ & \ddots & \\ & & \mathbf{1}_m \end{pmatrix} \end{aligned}$$

where  $y^*$  is an  $n \times 1$  latent variable vector,  $X$  is  $n \times k$  matrix of explanatory variables,  $\beta$  is  $k \times 1$ ,  $\epsilon$  is  $n \times 1$ , and  $\theta, \mu$  are  $m \times 1$ . The matrix  $\Delta$  assigns the same effect parameter to each observation within a region;  $\mathbf{1}_j, j = 1, \dots, m$  denotes an  $(n_j \times 1)$  vector of ones where  $n_j$  is the number of observations within region  $j$ . The model

assumes that  $\mu \sim N(0, \sigma_\mu^2 \mathbf{I}_m)$  and  $\epsilon|\theta \sim N(0, V)$ , where  $V = \begin{pmatrix} \nu_1 \mathbf{I}_{n_1} & & \\ & \ddots & \\ & & \nu_m \mathbf{I}_{n_m} \end{pmatrix}$

The matrix  $V$  allocates heterogeneity across regions through a set of variance scalars  $\nu_j, j = 1, \dots, m$  multiplied by the identity matrix  $\mathbf{I}_{n_j}$ .

Define an indicator function  $\delta(A) = 1$  for positive outcomes and  $\delta(A) = 0$  otherwise. Then, probability of deforestation can be written as:

$$\begin{aligned} Pr(y_{ij} = 1|y_{ij}^*) &= \delta(y_{ij}^* > 0) \\ Pr(y_{ij} = 0|y_{ij}^*) &= \delta(y_{ij}^* \leq 0) \end{aligned}$$

If we denote  $Y$  the  $n \times 1$  vector of binary outcomes, we can write  $Pr(Y = y|y^*) = \prod_{j=1}^m \prod_{k=1}^{n_j} \left\{ \delta(y_{jk} = 1)\delta(y_{jk}^* > 0) + \delta(y_{jk} = 0)\delta(y_{jk}^* \leq 0) \right\}$ .

The function *semip\_g* from LeSage's spatial econometric Matlab library [2] estimates this model through a hierarchical Bayesian estimation procedure using a Markov Chain Monte Carlo (MCMC) sampling approach. The following prior distributions are used:

$$\begin{aligned}\beta &\sim N(c, T) \\ \frac{r}{\nu_j} &\sim ID\chi^2(r) \\ \frac{1}{\sigma^2} &\sim \Gamma(\alpha, \tau) \\ \rho &\sim U[\lambda_{min}^{-1}, \lambda_{max}^{-1}]\end{aligned}$$

$\beta$  is assigned a normal conjugate prior with default values set to  $c = 0$ , and  $T = 1e^{12}$ , making it essentially diffuse. The variances  $\sigma^2$  are given inverse gamma priors with parameters  $\alpha = \tau = 0$ , also making them diffuse. The prior for each  $\nu_j$  is the inverse chi-square distribution, with hyperparameter  $r = 4$ . Finally, a uniform prior is employed for  $\rho$ , with  $\lambda_{min} = 0, \lambda_{max} = 1$ . The corresponding densities are:

$$\begin{aligned}\pi(\beta) &\propto \exp\left[-\frac{1}{2}(\beta - c)'T^{-1}(\beta - c)\right] \\ \pi(\sigma^2) &\propto (\sigma^2)^{-(\alpha+1)} \exp\left(-\frac{\tau}{\sigma^2}\right) \\ \pi(\rho) &\propto 1\end{aligned}$$

The implied prior density for the vector  $\theta$  conditional on  $\rho, \sigma_\mu^2, V$  is:

$$\begin{aligned}\pi(\theta|\rho, \sigma_\mu^2) &\propto (\sigma_\mu^2)^{-\frac{m}{2}} |B| \exp\left(-\frac{1}{2\sigma_\mu^2} \theta' B' B \theta\right) \\ B &= (I)_m - \rho W\end{aligned}$$

The prior density  $\epsilon$  given  $(\theta, V)$  is

$$\pi(\epsilon|V) \sim |V|^{-1/2} \exp\left(-\frac{1}{2}\epsilon'V^{-1}\epsilon\right)$$

and the conditional prior of  $y^*$  given  $(\beta, \sigma^2, \theta)$  is

$$\begin{aligned}\pi(y^*|\beta, \theta, V) &\propto |V|^{-1/2} \exp\left\{-\frac{1}{2}(y^* - X\beta - \Delta\theta)'V^{-1}(y^* - X\beta - \Delta\theta)\right\} \\ &= \prod_{j=1}^m \prod_{k=1}^{n_j} \left\{ \nu_j^{-1/2} \exp\left[-\frac{1}{2\nu_j}(y_{jk}^* - x'_{jk}\beta - \theta_j)^2\right] \right\}\end{aligned}$$

The posterior densities for  $\beta, \theta, \rho, \sigma^2, \nu_j, y_{ij}^*$  can be found in the original manuscript by Smith and LeSage and estimation is achieved via MCMC, a method that samples sequentially from the complete set of posterior conditional densities for each one of the parameters, given initial guesses. This method produces a set of estimates that converge in the limit to the true joint posterior distribution of the parameters [3].

## References

1. Smith, T. E., and James P LeSage. A Bayesian Probit Model with Spatial Dependencies. In *Advances in Econometrics: Spatial and Spatiotemporal Econometrics*, edited by James P LeSage and Pace Kelley. 127-60. Oxford: Elsevier, 2004.

2. LeSage, J. Econometrics toolbox. Available: <http://www.spatial-econometrics.com>
3. Gelfand, A. E., and A. F. M. Smith. Sampling-Based Approaches to Calculating Marginal Densities. *Journal of the American Statistical Association* 85, no. 410 (1990): 398-409.
